# Supplementary material
Source: publisher site journal article supplement (https://www.spandidos-publications.com/2826/downloadSupplementary)
Supplement: Supplementary file 1 [file downloadSupplementary]

## Sheet: Sheet1
Table SII. DECs of LACC-HGT tissues.
TargetID	FC(HGT_vs._LACC2)	Regulation(HGT_vs._LACC2)
hsa_circ_0000014	-4.36323	down
hsa_circ_0000116	-4.43735	down
hsa_circ_0000176	4.59445	up
hsa_circ_0000280	-3.17765	down
hsa_circ_0000392	-3.59143	down
hsa_circ_0000396	-2.04477	down
hsa_circ_0000458	-3.62993	down
hsa_circ_0000460	-3.25547	down
hsa_circ_0000502	-4.13469	down
hsa_circ_0000809	3.17177	up
hsa_circ_0001020	-2.30072	down
hsa_circ_0001073	2.24076	up
hsa_circ_0001074	-5.62866	down
hsa_circ_0001124	-3.99198	down
hsa_circ_0001266	-4.44529	down
hsa_circ_0001320	4.15532	up
hsa_circ_0001426	-2.32309	down
hsa_circ_0001689	-2.0724	down
hsa_circ_0001790	-3.3965	down
hsa_circ_0001803	-2.7127	down
hsa_circ_0001910	-5.11788	down
hsa_circ_0001913	-3.28874	down
hsa_circ_0001979	-2.08063	down
hsa_circ_0002001	-4.3843	down
hsa_circ_0002171	-3.01903	down
hsa_circ_0002274	-3.2495	down
hsa_circ_0002307	-4.03507	down
hsa_circ_0002355	-3.38259	down
hsa_circ_0002399	2.62082	up
hsa_circ_0002515	-3.08931	down
hsa_circ_0002722	-5.74896	down
hsa_circ_0002881	-4.56323	down
hsa_circ_0002930	-5.24555	down
hsa_circ_0002997	13.5367	up
hsa_circ_0003041	-3.96453	down
hsa_circ_0003158	-4.55992	down
hsa_circ_0003336	-5.97181	down
hsa_circ_0003400	-2.4545	down
hsa_circ_0003461	-2.53735	down
hsa_circ_0003480	-6.38493	down
hsa_circ_0003669	-2.43517	down
hsa_circ_0003712	-4.6543	down
hsa_circ_0003765	-2.79178	down
hsa_circ_0003832	-2.34899	down
hsa_circ_0003833	-2.23028	down
hsa_circ_0003925	-3.20477	down
hsa_circ_0003975	-6.84231	down
hsa_circ_0004086	-4.43938	down
hsa_circ_0004390	20.098	up
hsa_circ_0004407	-2.04615	down
hsa_circ_0004419	2.7542	up
hsa_circ_0004428	-5.02041	down
hsa_circ_0004498	-4.05556	down
hsa_circ_0004520	-6.5957	down
hsa_circ_0004576	-4.31965	down
hsa_circ_0004581	6.7436	up
hsa_circ_0004643	-2.24572	down
hsa_circ_0004651	3.11711	up
hsa_circ_0004683	-4.22811	down
hsa_circ_0004696	-3.56491	down
hsa_circ_0004718	19.1642	up
hsa_circ_0004738	-4.87452	down
hsa_circ_0004811	4.29772	up
hsa_circ_0004921	-4.04451	down
hsa_circ_0004993	2.08981	up
hsa_circ_0004994	2.04194	up
hsa_circ_0004996	-2.0015	down
hsa_circ_0005032	-4.20931	down
hsa_circ_0005097	-3.88364	down
hsa_circ_0005114	-2.19747	down
hsa_circ_0005146	-4.35397	down
hsa_circ_0005198	-3.08241	down
hsa_circ_0005231	-2.17004	down
hsa_circ_0005246	3.14953	up
hsa_circ_0005362	-4.08611	down
hsa_circ_0005419	3.85711	up
hsa_circ_0005521	-2.16744	down
hsa_circ_0005558	-3.97132	down
hsa_circ_0005670	-3.07611	down
hsa_circ_0005704	14.4732	up
hsa_circ_0005711	7.07661	up
hsa_circ_0005815	9.421	up
hsa_circ_0005917	2.87389	up
hsa_circ_0005932	-2.01994	down
hsa_circ_0006022	-9.97108	down
hsa_circ_0006065	-4.54391	down
hsa_circ_0006106	2.12049	up
hsa_circ_0006144	-2.32498	down
hsa_circ_0006159	-2.52922	down
hsa_circ_0006226	5.86553	up
hsa_circ_0006274	-5.16744	down
hsa_circ_0006296	-2.31747	down
hsa_circ_0006323	2.21949	up
hsa_circ_0006324	57.5919	up
hsa_circ_0006396	-2.84582	down
hsa_circ_0006424	-3.52803	down
hsa_circ_0006434	-2.04799	down
hsa_circ_0006484	-3.02759	down
hsa_circ_0006552	-4.61274	down
hsa_circ_0006554	4.30415	up
hsa_circ_0006578	3.33968	up
hsa_circ_0006685	5.56483	up
hsa_circ_0006800	-4.43412	down
hsa_circ_0006867	2.12035	up
hsa_circ_0006934	-2.6773	down
hsa_circ_0006946	2.46461	up
hsa_circ_0006957	3.20272	up
hsa_circ_0007075	-4.06118	down
hsa_circ_0007140	-2.12925	down
hsa_circ_0007293	-4.16605	down
hsa_circ_0007467	-2.2422	down
hsa_circ_0007548	5.45838	up
hsa_circ_0007608	-3.80778	down
hsa_circ_0007803	-2.51762	down
hsa_circ_0007876	3.19107	up
hsa_circ_0007898	-2.30526	down
hsa_circ_0007945	-2.22926	down
hsa_circ_0007970	2.5115	up
hsa_circ_0007986	-4.08923	down
hsa_circ_0007991	3.87719	up
hsa_circ_0008029	-4.24638	down
hsa_circ_0008051	-6.24306	down
hsa_circ_0008095	-9.13364	down
hsa_circ_0008160	4.83899	up
hsa_circ_0008164	3.29683	up
hsa_circ_0008246	-3.41144	down
hsa_circ_0008342	2.12375	up
hsa_circ_0008622	-3.94169	down
hsa_circ_0008707	-2.26806	down
hsa_circ_0008745	-3.63787	down
hsa_circ_0008794	-2.94915	down
hsa_circ_0008802	-4.74821	down
hsa_circ_0008851	-2.00626	down
hsa_circ_0008864	-2.64397	down
hsa_circ_0008893	-3.81834	down
hsa_circ_0008930	-11.0787	down
hsa_circ_0008961	-3.31959	down
hsa_circ_0008968	-3.4199	down
hsa_circ_0009169	-2.15119	down
hsa_circ_0009435	2.29146	up
hsa_circ_0009528	3.66219	up
hsa_circ_0009530	2.66339	up
hsa_circ_0009599	3.48919	up
hsa_circ_0009602	4.71941	up
hsa_circ_0009700	-2.57085	down
hsa_circ_0009891	2.12604	up
hsa_circ_0010071	-2.48873	down
hsa_circ_0010154	-2.8449	down
hsa_circ_0010187	178.54	up
hsa_circ_0010277	-2.24514	down
hsa_circ_0010909	-4.13543	down
hsa_circ_0010988	-6.58028	down
hsa_circ_0011023	2.04959	up
hsa_circ_0011027	2.14042	up
hsa_circ_0011084	-2.55491	down
hsa_circ_0011277	4.92085	up
hsa_circ_0011377	2.15546	up
hsa_circ_0011429	-2.8889	down
hsa_circ_0011456	-4.61411	down
hsa_circ_0011585	-4.79459	down
hsa_circ_0011816	-2.34579	down
hsa_circ_0011947	-7.0124	down
hsa_circ_0012142	3.65633	up
hsa_circ_0012172	-2.89288	down
hsa_circ_0012173	-2.26091	down
hsa_circ_0012271	5.81381	up
hsa_circ_0012548	8.10278	up
hsa_circ_0012550	5.1436	up
hsa_circ_0012797	-2.19012	down
hsa_circ_0012874	-2.58566	down
hsa_circ_0012998	-4.26647	down
hsa_circ_0013026	-3.98717	down
hsa_circ_0013058	16.8681	up
hsa_circ_0013174	-2.39822	down
hsa_circ_0013314	2.89869	up
hsa_circ_0013414	-4.03423	down
hsa_circ_0013444	-2.02274	down
hsa_circ_0013733	-3.96462	down
hsa_circ_0013948	-52.9774	down
hsa_circ_0014012	2.20986	up
hsa_circ_0014016	-4.69437	down
hsa_circ_0014105	-4.69419	down
hsa_circ_0014115	2.90971	up
hsa_circ_0014455	-2.05604	down
hsa_circ_0014515	2.93557	up
hsa_circ_0014570	-4.07786	down
hsa_circ_0014611	4.30545	up
hsa_circ_0014726	3.82395	up
hsa_circ_0014868	2.2762	up
hsa_circ_0014869	2.10605	up
hsa_circ_0015235	-2.46259	down
hsa_circ_0015335	-3.09549	down
hsa_circ_0015435	-2.00821	down
hsa_circ_0015498	-2.95561	down
hsa_circ_0015499	-4.05175	down
hsa_circ_0015796	8.71897	up
hsa_circ_0016068	3.09097	up
hsa_circ_0016365	-4.6059	down
hsa_circ_0016404	-2.15381	down
hsa_circ_0016437	2.18054	up
hsa_circ_0016466	4.74563	up
hsa_circ_0016661	-4.84065	down
hsa_circ_0017013	-2.45055	down
hsa_circ_0017197	3.2884	up
hsa_circ_0017214	-3.17334	down
hsa_circ_0017242	2.65206	up
hsa_circ_0017380	-3.21321	down
hsa_circ_0017412	-4.3764	down
hsa_circ_0017561	-2.37295	down
hsa_circ_0017644	-4.32346	down
hsa_circ_0017924	-9.38671	down
hsa_circ_0017994	2.15303	up
hsa_circ_0018205	2.51677	up
hsa_circ_0018243	-2.40777	down
hsa_circ_0018268	-2.22891	down
hsa_circ_0018337	-2.27966	down
hsa_circ_0018458	-2.13014	down
hsa_circ_0018606	-4.13755	down
hsa_circ_0019079	-5.84615	down
hsa_circ_0019348	2.25206	up
hsa_circ_0019379	-4.69841	down
hsa_circ_0019440	-2.23864	down
hsa_circ_0019448	-3.29604	down
hsa_circ_0019542	-4.59222	down
hsa_circ_0019618	4.1747	up
hsa_circ_0019773	2.88763	up
hsa_circ_0019806	12.9267	up
hsa_circ_0020080	-2.35696	down
hsa_circ_0020176	-3.12604	down
hsa_circ_0020332	2.23818	up
hsa_circ_0020449	-4.6189	down
hsa_circ_0020487	-2.35156	down
hsa_circ_0020600	-3.84171	down
hsa_circ_0020899	-2.27248	down
hsa_circ_0020959	-9.83446	down
hsa_circ_0020963	-7.49476	down
hsa_circ_0020967	-7.72562	down
hsa_circ_0021141	-3.37594	down
hsa_circ_0021330	2.41116	up
hsa_circ_0021647	2.16264	up
hsa_circ_0021885	4.86953	up
hsa_circ_0022404	2.86944	up
hsa_circ_0022433	-3.93315	down
hsa_circ_0022487	11.2877	up
hsa_circ_0022519	-2.2536	down
hsa_circ_0022928	4.7442	up
hsa_circ_0022967	-2.03539	down
hsa_circ_0023061	-2.85003	down
hsa_circ_0023367	-4.87206	down
hsa_circ_0023515	-3.40508	down
hsa_circ_0023557	5.46556	up
hsa_circ_0023690	3.5085	up
hsa_circ_0023737	-2.17568	down
hsa_circ_0023868	-2.27717	down
hsa_circ_0023993	3.4394	up
hsa_circ_0024602	-2.17716	down
hsa_circ_0024604	2.65055	up
hsa_circ_0024626	-3.95272	down
hsa_circ_0024708	-4.181	down
hsa_circ_0024718	6.69747	up
hsa_circ_0024935	-4.52053	down
hsa_circ_0024960	4.14176	up
hsa_circ_0025005	-4.05769	down
hsa_circ_0025068	-3.8238	down
hsa_circ_0025197	-2.12094	down
hsa_circ_0025210	6.92137	up
hsa_circ_0025306	-3.98935	down
hsa_circ_0025353	-10.7748	down
hsa_circ_0025420	-4.32793	down
hsa_circ_0025595	-101.202	down
hsa_circ_0025612	-2.21119	down
hsa_circ_0025726	-6.44774	down
hsa_circ_0025735	-2.41837	down
hsa_circ_0025860	6.01958	up
hsa_circ_0026081	2.04871	up
hsa_circ_0026150	-3.03817	down
hsa_circ_0026219	3.29062	up
hsa_circ_0026294	-2.93353	down
hsa_circ_0026308	5.74257	up
hsa_circ_0026334	10.8228	up
hsa_circ_0026419	2.78374	up
hsa_circ_0026724	-2.0073	down
hsa_circ_0026725	-4.47081	down
hsa_circ_0026851	-3.76763	down
hsa_circ_0027418	4.375	up
hsa_circ_0027513	2.32966	up
hsa_circ_0027702	-3.11332	down
hsa_circ_0027718	3.1344	up
hsa_circ_0027748	2.18505	up
hsa_circ_0027765	-2.60619	down
hsa_circ_0027823	2.13039	up
hsa_circ_0028052	-4.01512	down
hsa_circ_0028268	-2.67349	down
hsa_circ_0028273	-4.90438	down
hsa_circ_0029106	-3.99759	down
hsa_circ_0029233	3.17789	up
hsa_circ_0029427	-2.40509	down
hsa_circ_0029490	3.28684	up
hsa_circ_0029495	-4.5282	down
hsa_circ_0029653	-7.66611	down
hsa_circ_0029879	2.26778	up
hsa_circ_0030003	-2.67835	down
hsa_circ_0030072	-3.30375	down
hsa_circ_0030235	2.01928	up
hsa_circ_0030240	-3.83818	down
hsa_circ_0030354	-2.98269	down
hsa_circ_0030979	3.77949	up
hsa_circ_0030981	-4.28914	down
hsa_circ_0031002	-3.09113	down
hsa_circ_0031011	-4.17792	down
hsa_circ_0031220	3.55775	up
hsa_circ_0031333	-4.31072	down
hsa_circ_0031632	-3.31374	down
hsa_circ_0031663	-2.37626	down
hsa_circ_0031693	-2.11224	down
hsa_circ_0031983	65.8442	up
hsa_circ_0032329	2.21383	up
hsa_circ_0032383	3.99914	up
hsa_circ_0033188	4.60291	up
hsa_circ_0033274	-3.13027	down
hsa_circ_0033351	-5.38177	down
hsa_circ_0033365	2.84078	up
hsa_circ_0033493	-4.22977	down
hsa_circ_0034040	-4.14575	down
hsa_circ_0034067	-2.9735	down
hsa_circ_0034144	-2.50134	down
hsa_circ_0034269	2.10697	up
hsa_circ_0034651	-4.06211	down
hsa_circ_0034799	-2.32625	down
hsa_circ_0034927	2.27042	up
hsa_circ_0034937	-4.49017	down
hsa_circ_0035042	-2.06636	down
hsa_circ_0035115	6.2831	up
hsa_circ_0035312	-2.33684	down
hsa_circ_0035543	2.20446	up
hsa_circ_0035830	-19.1075	down
hsa_circ_0036067	-5.70864	down
hsa_circ_0036367	2.0167	up
hsa_circ_0036440	-2.38546	down
hsa_circ_0036538	4.58713	up
hsa_circ_0036649	-2.40172	down
hsa_circ_0036683	2.49757	up
hsa_circ_0037373	-2.74358	down
hsa_circ_0037563	-4.26192	down
hsa_circ_0037956	-2.32992	down
hsa_circ_0038344	-4.2883	down
hsa_circ_0038440	-2.04706	down
hsa_circ_0038758	-4.56314	down
hsa_circ_0038781	-2.89963	down
hsa_circ_0038952	2.56748	up
hsa_circ_0039254	-4.53487	down
hsa_circ_0039615	2.26603	up
hsa_circ_0039757	-18.7338	down
hsa_circ_0040054	-2.51755	down
hsa_circ_0040241	-2.17428	down
hsa_circ_0040251	-2.56233	down
hsa_circ_0040420	2.63143	up
hsa_circ_0040439	2.36793	up
hsa_circ_0040487	6.98783	up
hsa_circ_0041462	-3.99479	down
hsa_circ_0041501	3.07893	up
hsa_circ_0041631	3.35821	up
hsa_circ_0042026	-3.89149	down
hsa_circ_0042027	-2.03774	down
hsa_circ_0042270	-3.86507	down
hsa_circ_0042349	7.69236	up
hsa_circ_0042547	7.32285	up
hsa_circ_0042812	3.85852	up
hsa_circ_0042858	7.18798	up
hsa_circ_0043117	-6.97227	down
hsa_circ_0043261	3.5169	up
hsa_circ_0043401	-3.40568	down
hsa_circ_0043450	7.3653	up
hsa_circ_0043476	-2.26782	down
hsa_circ_0043656	-2.22493	down
hsa_circ_0043801	-2.95899	down
hsa_circ_0043825	3.45227	up
hsa_circ_0044293	5.4754	up
hsa_circ_0044333	2.72997	up
hsa_circ_0044375	-2.0223	down
hsa_circ_0044672	-3.0434	down
hsa_circ_0044976	-8.0278	down
hsa_circ_0045002	-2.09545	down
hsa_circ_0045409	15.3442	up
hsa_circ_0045543	-2.22221	down
hsa_circ_0045682	2.03586	up
hsa_circ_0046456	-2.13529	down
hsa_circ_0046694	-4.52747	down
hsa_circ_0046964	2.62629	up
hsa_circ_0046965	3.1847	up
hsa_circ_0047016	2.00699	up
hsa_circ_0047270	-3.9211	down
hsa_circ_0047304	3.70291	up
hsa_circ_0047318	3.34239	up
hsa_circ_0047610	-2.64524	down
hsa_circ_0047848	2.08823	up
hsa_circ_0047976	-2.80092	down
hsa_circ_0048246	10.0751	up
hsa_circ_0048247	11.0825	up
hsa_circ_0048543	3.2056	up
hsa_circ_0049144	10.6609	up
hsa_circ_0049166	2.41248	up
hsa_circ_0049617	-2.08796	down
hsa_circ_0050006	2.29248	up
hsa_circ_0050019	3.56641	up
hsa_circ_0050178	-2.97988	down
hsa_circ_0050501	7.88468	up
hsa_circ_0050820	2.37816	up
hsa_circ_0050880	4.21036	up
hsa_circ_0050894	-2.45039	down
hsa_circ_0050924	-6.20133	down
hsa_circ_0050998	248.273	up
hsa_circ_0051187	-4.25708	down
hsa_circ_0051905	-3.85048	down
hsa_circ_0052078	-2.51874	down
hsa_circ_0052129	5.12673	up
hsa_circ_0052300	2.22224	up
hsa_circ_0052303	3.83649	up
hsa_circ_0052544	2.87152	up
hsa_circ_0052819	-20.7253	down
hsa_circ_0052877	2.43794	up
hsa_circ_0052960	22.2446	up
hsa_circ_0053153	2.02395	up
hsa_circ_0053921	-3.18789	down
hsa_circ_0054497	4.57639	up
hsa_circ_0054535	-2.11618	down
hsa_circ_0054539	-3.60737	down
hsa_circ_0054598	-2.31834	down
hsa_circ_0054903	-4.48443	down
hsa_circ_0055024	4.64115	up
hsa_circ_0055034	3.56284	up
hsa_circ_0055208	2.26849	up
hsa_circ_0055388	-4.0743	down
hsa_circ_0055732	-3.71329	down
hsa_circ_0056189	3.44686	up
hsa_circ_0056530	2.70312	up
hsa_circ_0056785	3.70643	up
hsa_circ_0056795	-3.40354	down
hsa_circ_0056945	-3.85116	down
hsa_circ_0057185	-3.43102	down
hsa_circ_0057509	5.76253	up
hsa_circ_0057529	-2.38932	down
hsa_circ_0057551	-3.83394	down
hsa_circ_0057608	-3.28787	down
hsa_circ_0057802	-2.10141	down
hsa_circ_0058171	-13.1349	down
hsa_circ_0058179	-4.29721	down
hsa_circ_0058189	-4.10478	down
hsa_circ_0058218	-2.01515	down
hsa_circ_0058281	3.26065	up
hsa_circ_0058468	-2.0473	down
hsa_circ_0058551	-2.3158	down
hsa_circ_0058567	-3.14803	down
hsa_circ_0059155	-2.79829	down
hsa_circ_0059233	3.33697	up
hsa_circ_0059395	-4.7411	down
hsa_circ_0059430	4.12894	up
hsa_circ_0059514	3.77298	up
hsa_circ_0059711	3.087	up
hsa_circ_0059719	-5.52992	down
hsa_circ_0059733	2.32644	up
hsa_circ_0059734	-2.04071	down
hsa_circ_0060036	-4.15	down
hsa_circ_0060064	2.70321	up
hsa_circ_0060084	4.35434	up
hsa_circ_0060106	-2.24197	down
hsa_circ_0060147	-6.23997	down
hsa_circ_0060165	-3.0521	down
hsa_circ_0060283	-4.38594	down
hsa_circ_0060314	-4.21082	down
hsa_circ_0060415	-2.73152	down
hsa_circ_0060488	2.00438	up
hsa_circ_0060785	-4.35219	down
hsa_circ_0060995	-2.96686	down
hsa_circ_0061107	2.31053	up
hsa_circ_0061423	-2.40132	down
hsa_circ_0061525	-5.26495	down
hsa_circ_0062558	3.30581	up
hsa_circ_0062614	3.55807	up
hsa_circ_0062729	-4.99558	down
hsa_circ_0062990	4.73887	up
hsa_circ_0063022	-3.61929	down
hsa_circ_0063267	2.89163	up
hsa_circ_0063316	3.17601	up
hsa_circ_0063317	-2.10563	down
hsa_circ_0063686	2.65446	up
hsa_circ_0063876	9.21123	up
hsa_circ_0064097	-2.42908	down
hsa_circ_0064213	-6.59855	down
hsa_circ_0064365	-2.99803	down
hsa_circ_0064811	-3.51269	down
hsa_circ_0064982	4.59228	up
hsa_circ_0065228	5.02019	up
hsa_circ_0065334	2.09506	up
hsa_circ_0065550	2.72577	up
hsa_circ_0065707	6.47713	up
hsa_circ_0065784	-4.54429	down
hsa_circ_0065941	-2.51059	down
hsa_circ_0066137	-3.62293	down
hsa_circ_0066732	-2.11227	down
hsa_circ_0066864	3.12353	up
hsa_circ_0067087	-2.70355	down
hsa_circ_0067229	-2.06797	down
hsa_circ_0067231	-4.17505	down
hsa_circ_0067392	-4.08754	down
hsa_circ_0067536	-2.30485	down
hsa_circ_0067712	-7.20535	down
hsa_circ_0067883	3.63504	up
hsa_circ_0067962	2.1871	up
hsa_circ_0068052	-3.92887	down
hsa_circ_0068334	7.22649	up
hsa_circ_0068377	2.06364	up
hsa_circ_0068730	-3.94722	down
hsa_circ_0068767	2.77207	up
hsa_circ_0068771	-3.92221	down
hsa_circ_0069220	2.15184	up
hsa_circ_0069383	5.72965	up
hsa_circ_0069411	2.39586	up
hsa_circ_0069481	-2.68391	down
hsa_circ_0070040	-4.35566	down
hsa_circ_0070562	-14.9274	down
hsa_circ_0070688	-3.34793	down
hsa_circ_0070727	16.5743	up
hsa_circ_0070997	2.77919	up
hsa_circ_0071037	-3.63078	down
hsa_circ_0071593	-3.60081	down
hsa_circ_0071652	13.6793	up
hsa_circ_0072243	-77.6438	down
hsa_circ_0072263	5.11773	up
hsa_circ_0072594	-2.60075	down
hsa_circ_0072765	5.4984	up
hsa_circ_0072766	2.02759	up
hsa_circ_0072971	2.37463	up
hsa_circ_0073155	3.93464	up
hsa_circ_0073517	2.95042	up
hsa_circ_0073814	-2.3623	down
hsa_circ_0073824	3.47369	up
hsa_circ_0074275	2.84905	up
hsa_circ_0074362	-4.72819	down
hsa_circ_0074441	-2.19147	down
hsa_circ_0074483	5.54297	up
hsa_circ_0074737	-2.14191	down
hsa_circ_0074839	-4.1363	down
hsa_circ_0074842	8.29792	up
hsa_circ_0074876	-2.7601	down
hsa_circ_0075056	-24.4394	down
hsa_circ_0075136	-3.33312	down
hsa_circ_0075158	4.77698	up
hsa_circ_0075445	4.06823	up
hsa_circ_0075499	3.68602	up
hsa_circ_0075533	-3.89062	down
hsa_circ_0075799	-8.54059	down
hsa_circ_0076134	-2.3283	down
hsa_circ_0076143	-5.47336	down
hsa_circ_0076155	-2.57339	down
hsa_circ_0076411	-73.2943	down
hsa_circ_0076751	3.88106	up
hsa_circ_0076878	4.96266	up
hsa_circ_0077079	-4.07406	down
hsa_circ_0077098	6.94454	up
hsa_circ_0077167	-2.16367	down
hsa_circ_0077834	-5.58932	down
hsa_circ_0077880	10.3956	up
hsa_circ_0077881	6.15558	up
hsa_circ_0078475	3.42129	up
hsa_circ_0078676	-3.96936	down
hsa_circ_0078752	-2.18651	down
hsa_circ_0079371	-2.38545	down
hsa_circ_0079375	-8.05697	down
hsa_circ_0079524	15.2679	up
hsa_circ_0079694	54.0363	up
hsa_circ_0079713	-2.01956	down
hsa_circ_0079726	-4.54547	down
hsa_circ_0080044	-2.00177	down
hsa_circ_0080760	-4.9392	down
hsa_circ_0080778	-3.64598	down
hsa_circ_0080878	2.16312	up
hsa_circ_0081047	15.4497	up
hsa_circ_0082012	-5.89484	down
hsa_circ_0082036	82.2013	up
hsa_circ_0082070	-2.12063	down
hsa_circ_0082304	-3.15447	down
hsa_circ_0082362	-2.29765	down
hsa_circ_0082414	-4.66783	down
hsa_circ_0082734	2.40619	up
hsa_circ_0082818	2.4969	up
hsa_circ_0083068	-3.55776	down
hsa_circ_0083085	-4.15345	down
hsa_circ_0083089	-3.82927	down
hsa_circ_0083438	2.00573	up
hsa_circ_0083564	-3.57519	down
hsa_circ_0083572	6.04526	up
hsa_circ_0084015	2.66093	up
hsa_circ_0084163	2.20209	up
hsa_circ_0084197	-4.76365	down
hsa_circ_0084216	2.68121	up
hsa_circ_0084773	-5.04277	down
hsa_circ_0084954	2.89641	up
hsa_circ_0085020	3.33617	up
hsa_circ_0085091	-4.03871	down
hsa_circ_0085243	3.0318	up
hsa_circ_0085368	-2.07049	down
hsa_circ_0085473	4.94782	up
hsa_circ_0085578	-2.90983	down
hsa_circ_0085612	4.08574	up
hsa_circ_0085631	2.73667	up
hsa_circ_0085938	-4.69934	down
hsa_circ_0085939	-2.43091	down
hsa_circ_0086161	2.757	up
hsa_circ_0086485	-2.05846	down
hsa_circ_0086512	3.37537	up
hsa_circ_0086765	12.0278	up
hsa_circ_0087204	-2.01301	down
hsa_circ_0087273	-3.13371	down
hsa_circ_0087336	-2.06018	down
hsa_circ_0087342	-27.9365	down
hsa_circ_0087683	-3.3124	down
hsa_circ_0087749	-3.56908	down
hsa_circ_0087775	5.61152	up
hsa_circ_0087882	-4.75284	down
hsa_circ_0088079	2.72675	up
hsa_circ_0088391	-2.28345	down
hsa_circ_0088477	3.41301	up
hsa_circ_0088620	3.5755	up
hsa_circ_0088810	-5.38221	down
hsa_circ_0089050	2.37657	up
hsa_circ_0089269	6.23151	up
hsa_circ_0089832	-2.33164	down
hsa_circ_0089846	3.5507	up
hsa_circ_0090046	-2.34947	down
hsa_circ_0090051	2.88042	up
hsa_circ_0090091	-2.81382	down
hsa_circ_0090101	-5.54571	down
hsa_circ_0090123	2.32306	up
hsa_circ_0090168	-3.97952	down
hsa_circ_0090324	2.06347	up
hsa_circ_0090395	-4.09857	down
hsa_circ_0090531	9.15694	up
hsa_circ_0090698	-4.15431	down
hsa_circ_0090799	-3.30483	down
hsa_circ_0090845	17.4223	up
hsa_circ_0090846	8.79253	up
hsa_circ_0091053	5.20868	up
hsa_circ_0091187	4.21011	up
hsa_circ_0091349	-4.09163	down
hsa_circ_0091425	6.02181	up
hsa_circ_0091479	-3.91021	down
hsa_circ_0091539	-2.89933	down
hsa_circ_0091725	4.85929	up
hsa_circ_0091831	-53.9002	down
hsa_circ_0091845	2.09904	up
hsa_circ_0092051	-2.74903	down
hsa_circ_0092057	-4.61062	down
